# Supplementary material
Source: PubMed Central journal article supplement (PMC3431439)
Supplement: NIHMS391094-supplement-1.pdf [file NIHMS391094-supplement-1.pdf]

## Supplemental Information

### Alzheimer Amyloid- $\beta$ Oligomer Bound to Post-Synaptic Prion Protein Activates Fyn to Impair Neurons

Ji Won Um, Haakon B. Nygaard, Jacqueline K. Heiss, Mikhail A. Kostylev, Massimiliano Stagi, Alexander Vortmeyer, Thomas Wisniewski, Erik C. Gunther and Stephen M. Strittmatter

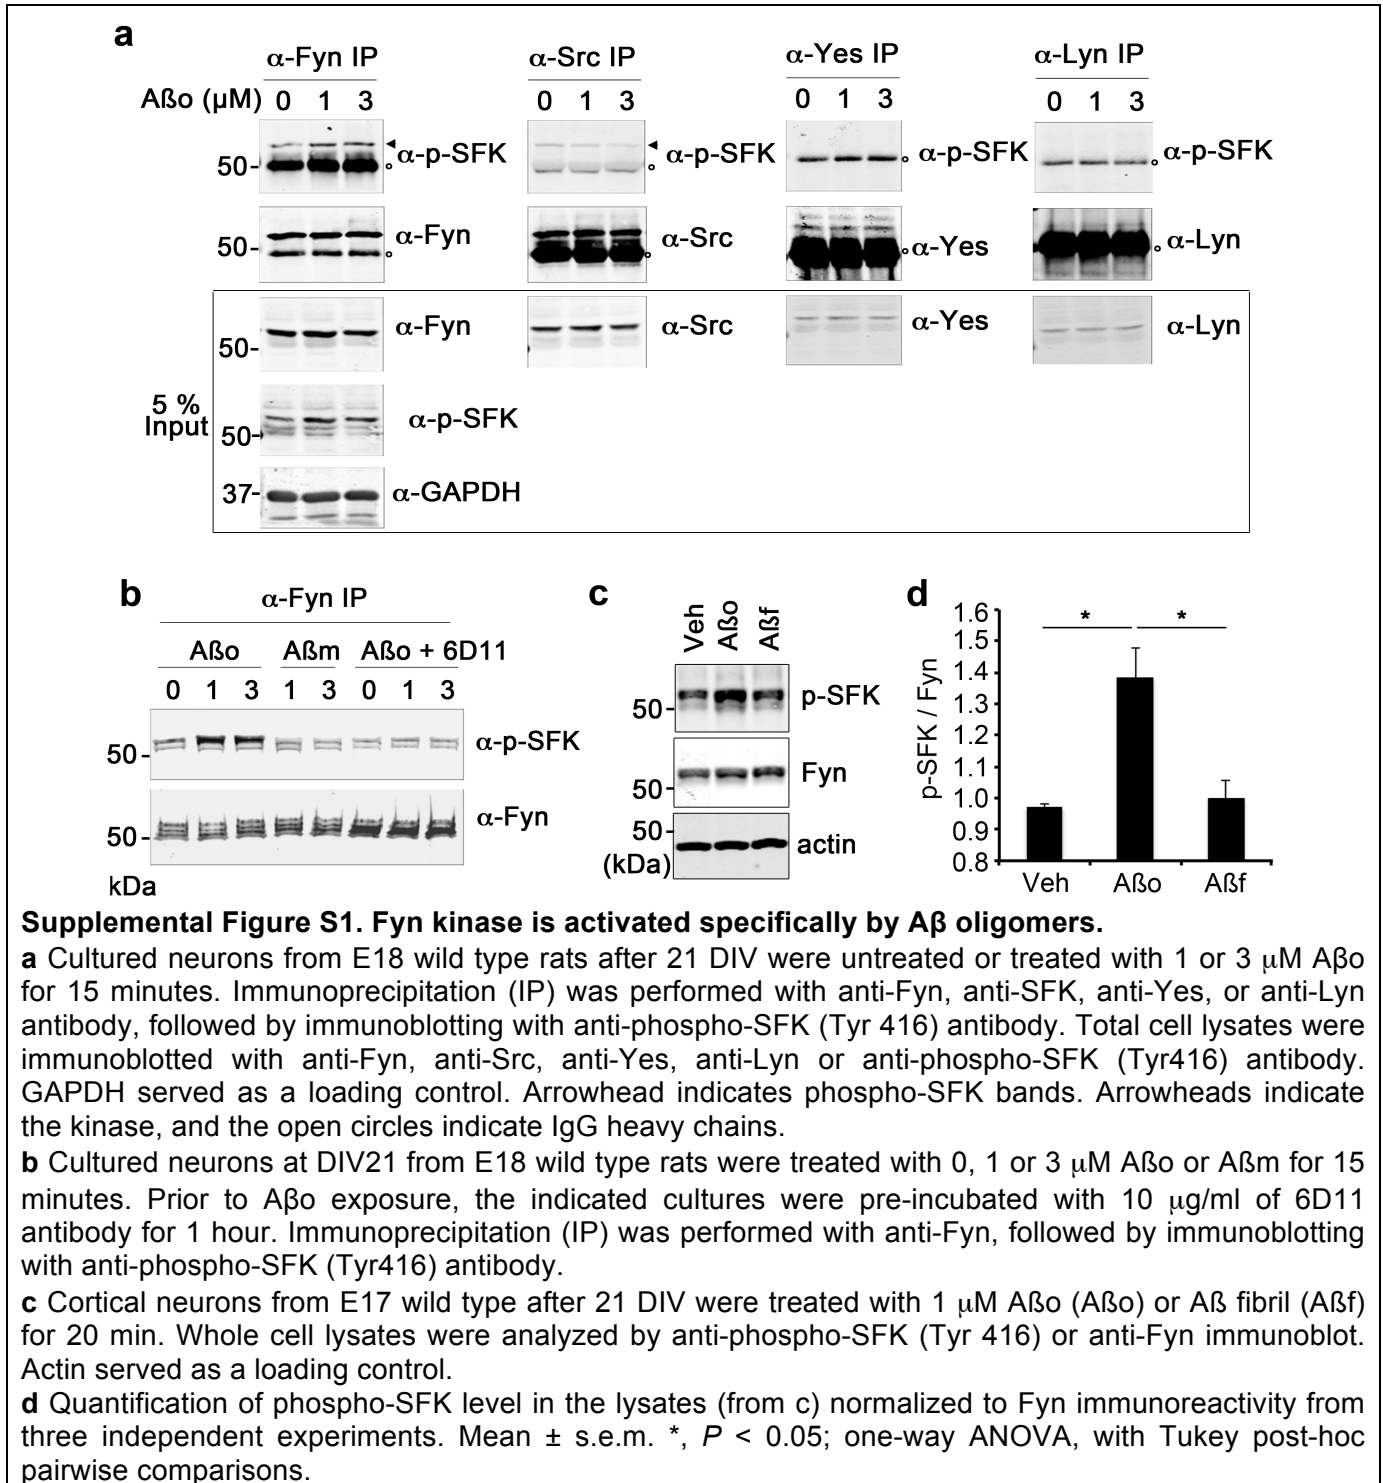

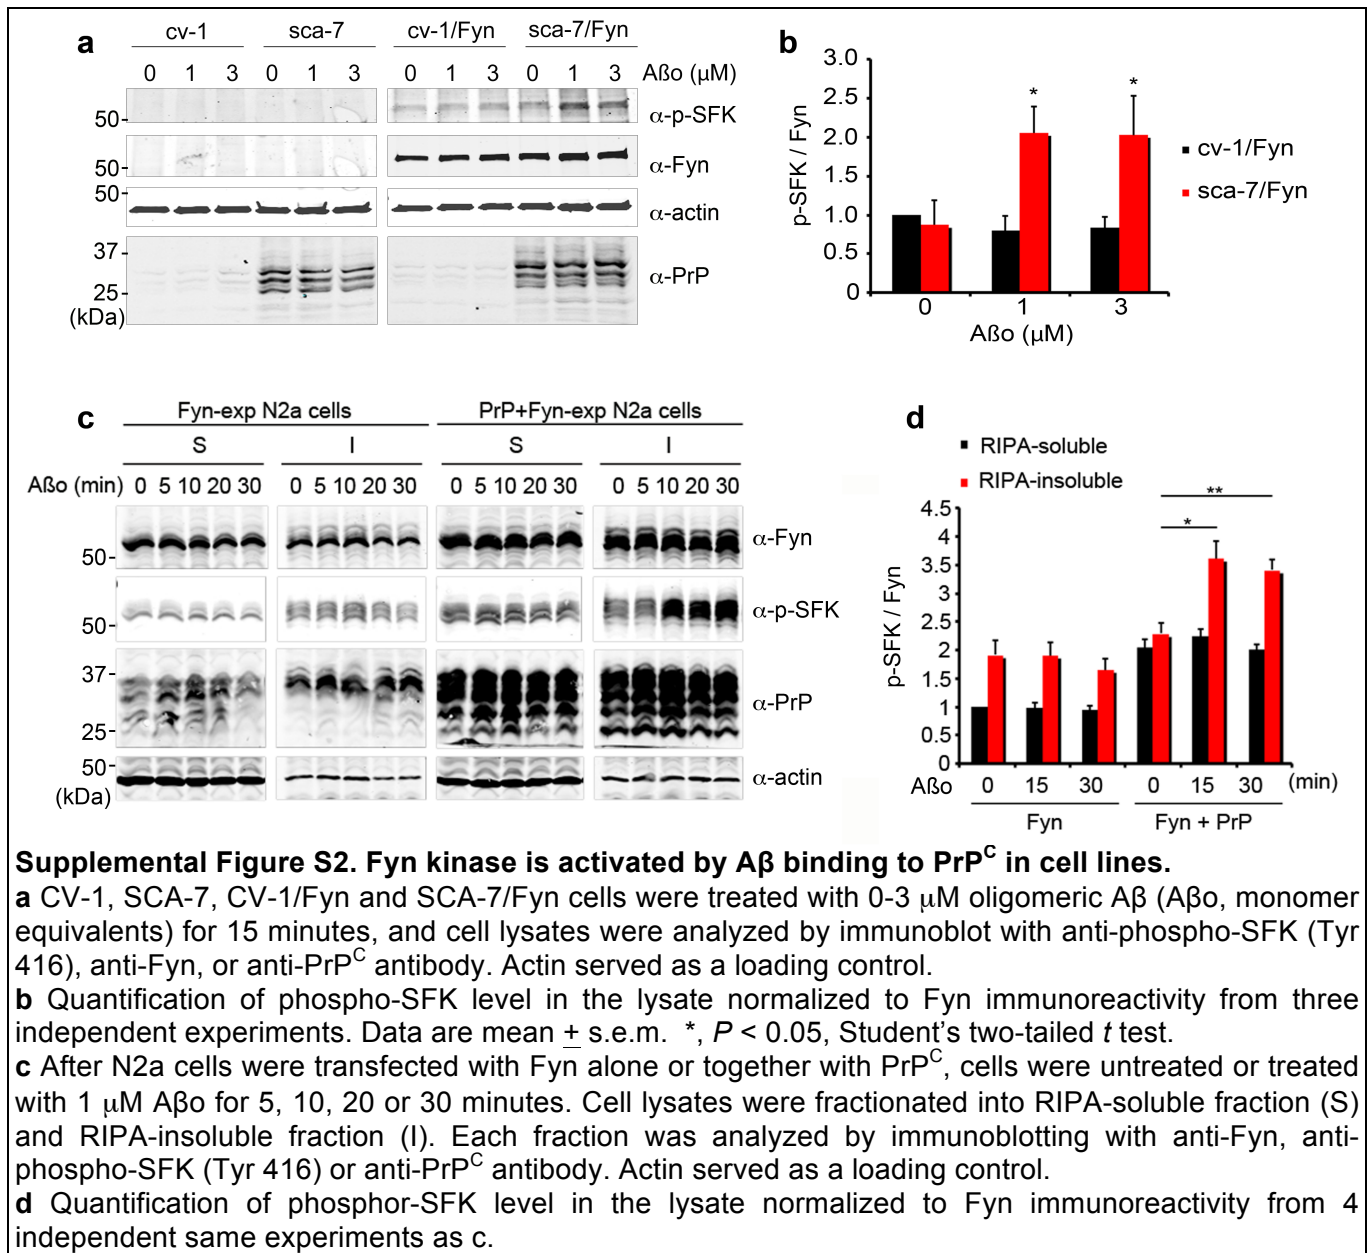

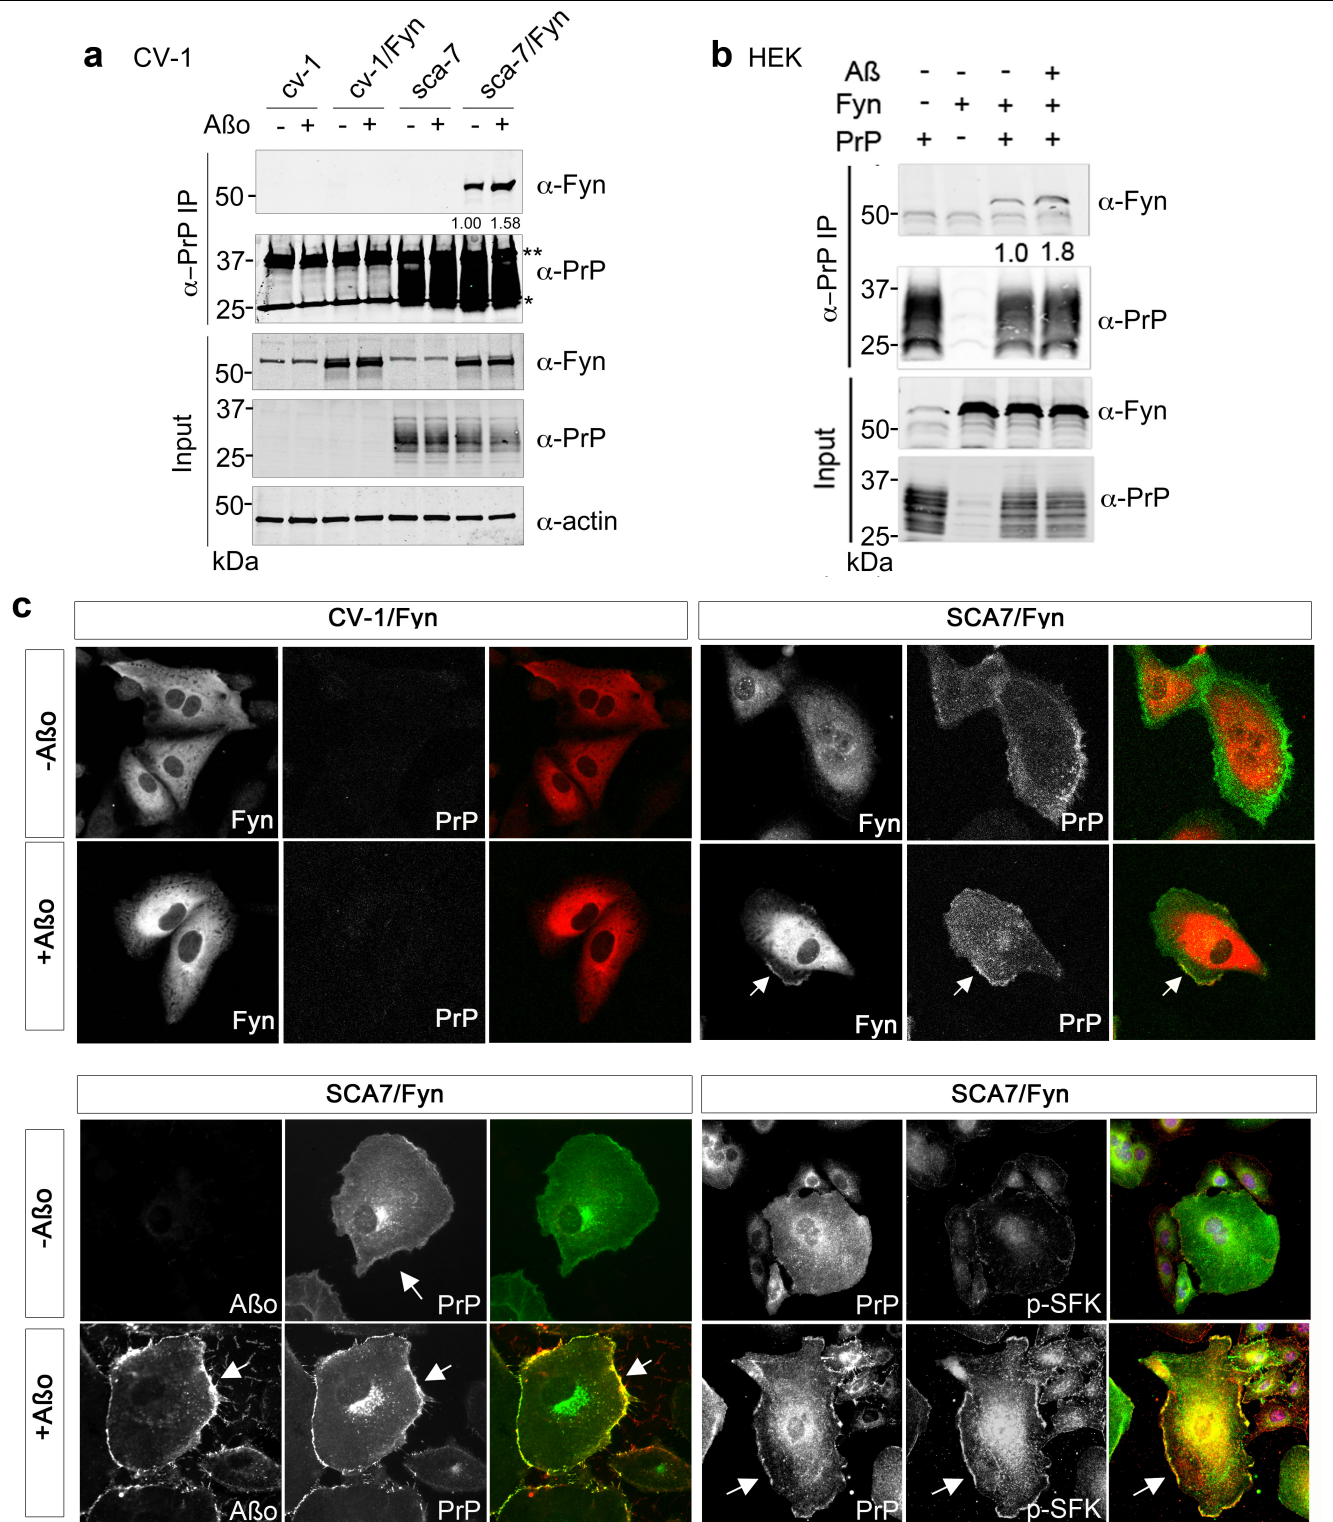

**Supplemental Figure S3. A $\beta$ o induce PrP<sup>C</sup>/Fyn Association and Co-Localization.**

**a** CV-1, CV-1/Fyn, SCA-7 and SCA-7/Fyn cells were treated with 0 or 1  $\mu$ M A $\beta$ o for 1.5 hours, and immunoprecipitation (IP) was performed with anti-PrP<sup>C</sup> antibody. Whole lysates and anti-PrP<sup>C</sup> immunoprecipitates were immunoblotted with anti-Fyn or anti-PrP<sup>C</sup> antibody. The values at the bottom of the top panel indicate the relative quantities of Fyn bands. Actin served as a loading control. The asterisks are non-specific bands from the immunoprecipitation.

**b** After HEK293 cells were transfected with PrP<sup>C</sup> and Fyn, cells were treated with 0 or 1  $\mu$ M A $\beta$ o for 1.5

hours. Immunoprecipitation (IP) was performed with anti-PrP antibody, and then whole lysates and anti-PrP<sup>C</sup> immunoprecipitates were immunoblotted with anti-Fyn or anti-PrP<sup>C</sup> antibody. The values at the bottom of the top panel indicate the relative quantities of Fyn bands.

**c** CV-1/Fyn (upper left set) and SCA-7/Fyn cells (upper right set) were treated with 0-1  $\mu$ M A $\beta$ o for 15 minutes, and labeled with mouse anti-PrP<sup>C</sup> on ice and then fixed, permeabilized and labeled with rabbit anti-Fyn antibodies. Immunostained preparations were examined using laser scanning confocal microscope. Note colocalization in ruffles indicated by arrowheads.

In the lower set of panels, SCA-7/Fyn cells were treated with 0-1  $\mu$ M biotinylated A $\beta$ o (lower left set) or non-biotinylated A $\beta$ o (lower right set) and then fixed, permeabilized and labeled with mouse anti-PrP<sup>C</sup> and streptavidin covalently attached with Alexa Fluor 568 (lower left) or with mouse anti-PrP<sup>C</sup> (3F4 clone) and rabbit anti-phospho-SFK (Tyr 416) antibodies (lower right). Immunostained preparations were examined using epifluorescent microscopy.



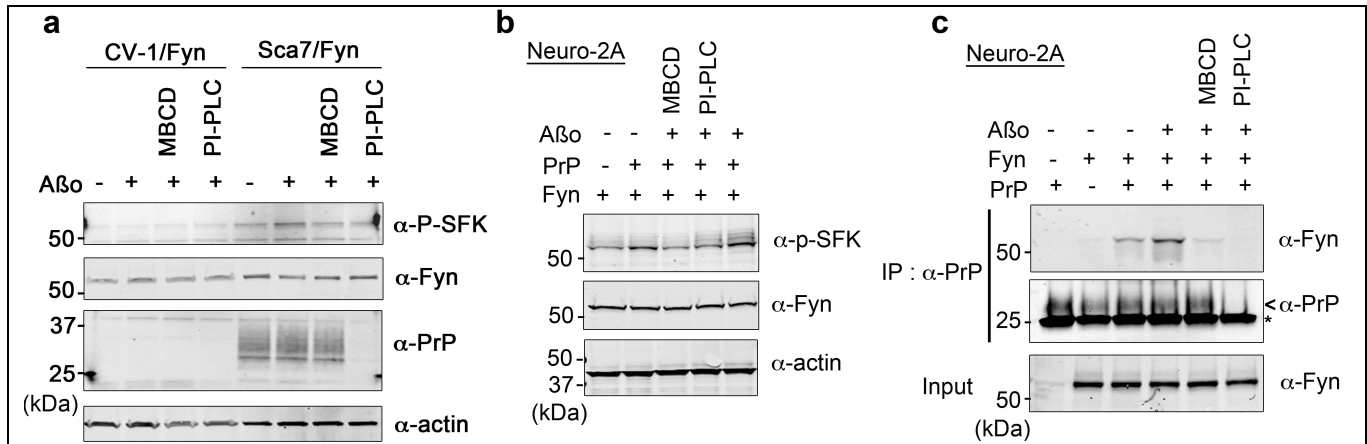

### Supplemental Figure S4. Aβo Activation of PrP/Fyn Requires Lipid Rafts and GPI Anchorage in Cell Lines.

**a** CV-1/Fyn or SCA7/Fyn cells were treated with 0 or 1 μM Aβo for 20 min. Prior to Aβo exposure, the indicated cultures were pre-treated with 5 mg/ml MBCD for 1 hour or 0.1 unit of PI-PLC for 10 min. Cell lysates were analyzed by immunoblot with anti-phospho-SFK (Tyr 416), anti-Fyn, or anti-PrP<sup>C</sup> antibody. Actin served as a loading control.

**b** After N2a cells were transfected with PrP<sup>C</sup> and Fyn, cells were treated with 0 or 1 μM Aβo for 20 min. Prior to Aβo exposure, the indicated cultures were pre-treated with 5 mg/ml MBCD for 1 hour or 0.1 unit of PI-PLC for 10 min. Cell lysates were analyzed by immunoblotting with anti-phospho-SFK (Tyr 416) or anti-Fyn antibodies. Actin served as a loading control.

**c** After N2a cells were transfected with PrP<sup>C</sup> and Fyn, cells were treated with 0 or 1 μM Aβo for 1.5 hours. Prior to Aβo exposure, the indicated subcultures were pre-treated with 5 mg/ml methyl-β-cyclodextrin (MBCD) for 1 hour or 0.1 unit of PI-PLC for 10 min. IP was performed with anti-PrP<sup>C</sup> antibody, and then anti-PrP<sup>C</sup> immunoprecipitates were immunoblotted with anti-Fyn or anti-PrP<sup>C</sup> antibody. The asterisk indicates IgG light chain and the arrowhead, PrP<sup>C</sup>.

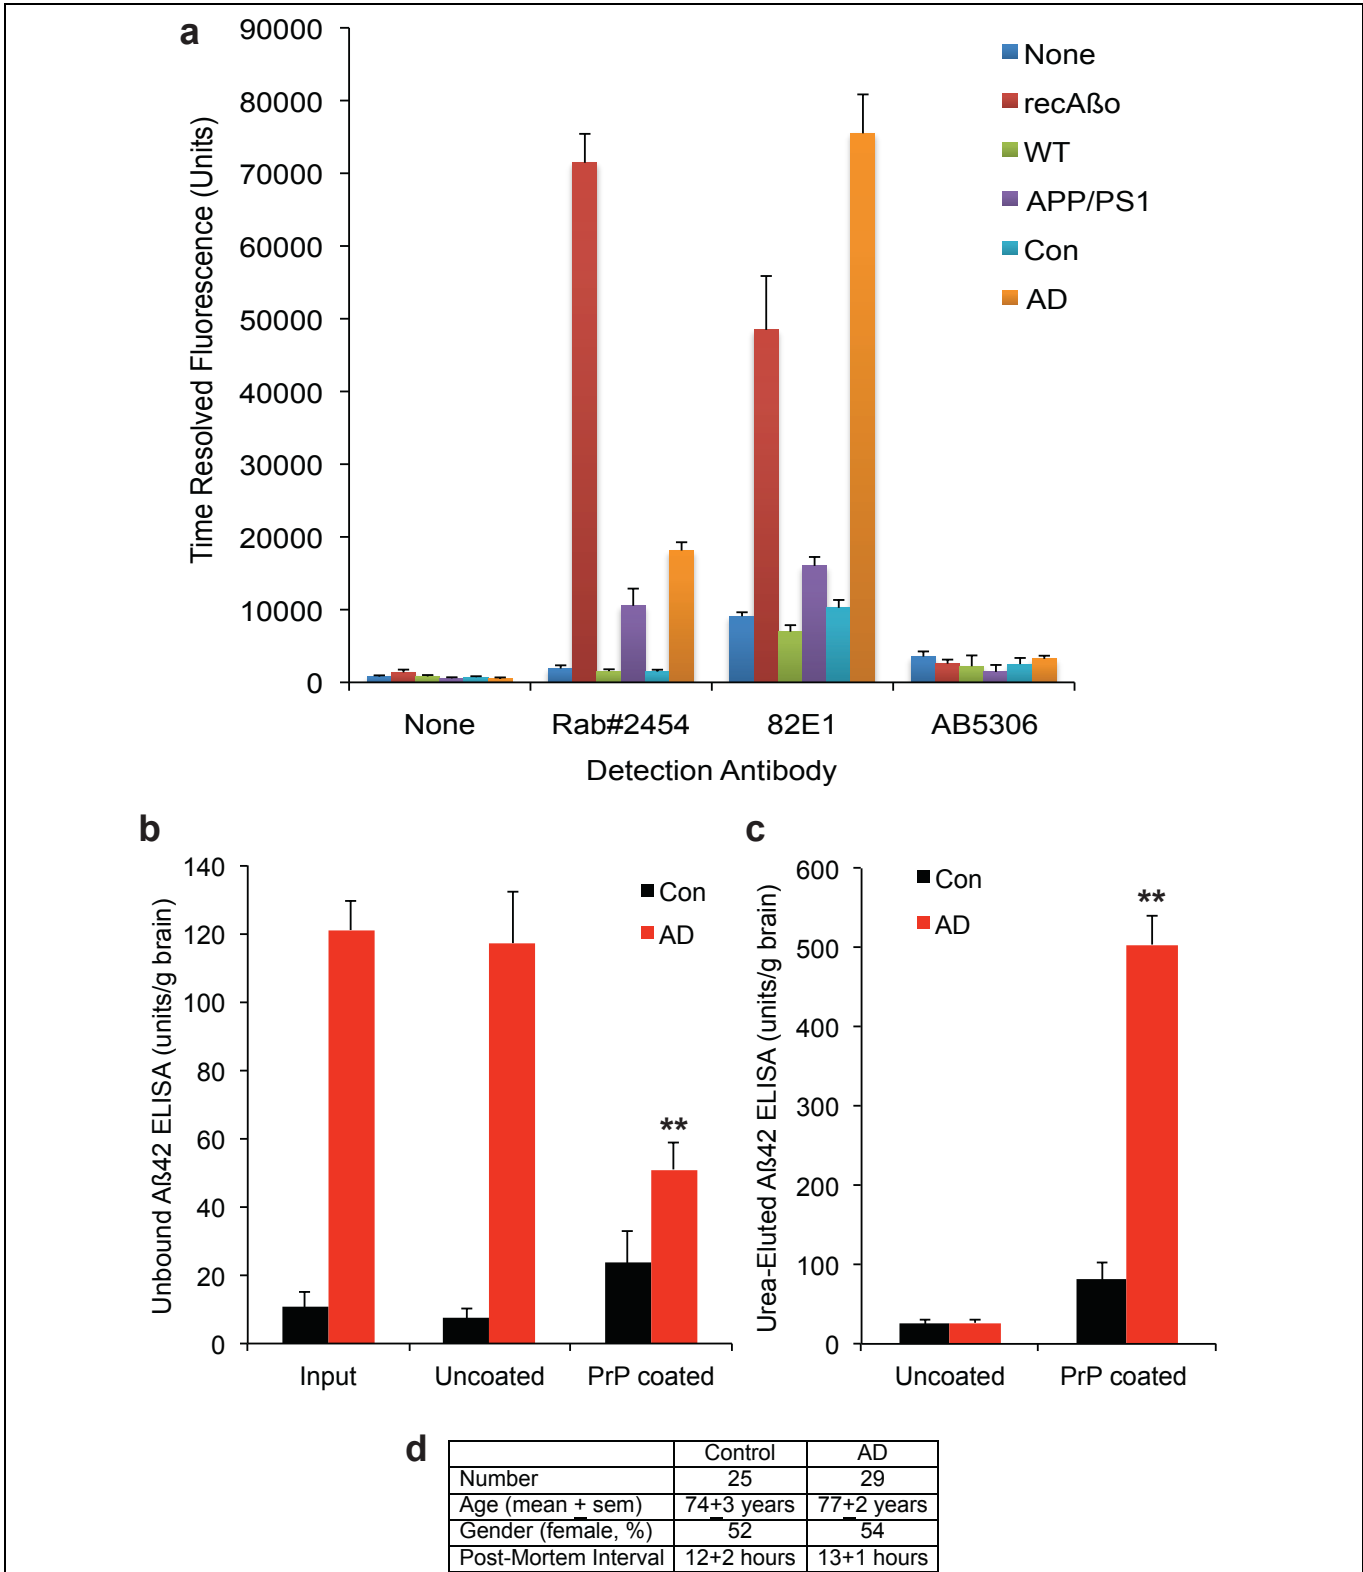

**Supplemental Figure S5. Detection of Aβo Bound to PrP (23-111).**

**a** Different samples containing Aβ species were incubated with immobilized PrP(23-111). Samples: pure Aβo (recAβo, 1 ng), wild type mouse brain (WT, 10 μg total protein), APPswe/PS1ΔE9 mouse brain (APP/PS1, 10 μg protein), control human TBS brain extract (Con, 50 μg protein) or AD human TBS brain extract (AD, 50 μg protein). Bound Aβ was detected by time-resolved fluorescence derived

from anti-A $\beta$  antibody and europium-tagged secondary reagents, using the indicated primary antibodies. Mean  $\pm$  s.e.m. for 3 replicates.

**b** Total A $\beta$ 42 immunoreactivity in TBS-Soluble extracts pooled from 4 Control or 4 AD Brain specimens was assessed by standard sandwich A $\beta$ 42 ELISA assay. The brain extract was assayed before (Input) and after incubation with microtiter wells coated with or without PrP(23-111), as indicated. The level of A $\beta$ 42 immunoreactivity after incubation with PrP-coated wells is decreased ( $P < 0.01$ , ANOVA) relative to the Input or incubation with control non-PrP wells. Mean  $\pm$  sem from n=4 replicates.

**c** Uncoated or PrP-coated wells previously exposed to AD or Control brain TBS-soluble extracts were eluted with 10 M Urea, and the eluted material was assayed for A $\beta$ 42 immunoreactivity. Greater immunoreactivity is eluted from PrP-coated wells exposed to AD extract ( $P < 0.01$ , ANOVA) relative to other conditions. Mean  $\pm$  sem from n=4 replicates.

**d** Characteristics of human brain samples used for assay of PrP-interacting A $\beta$  species.

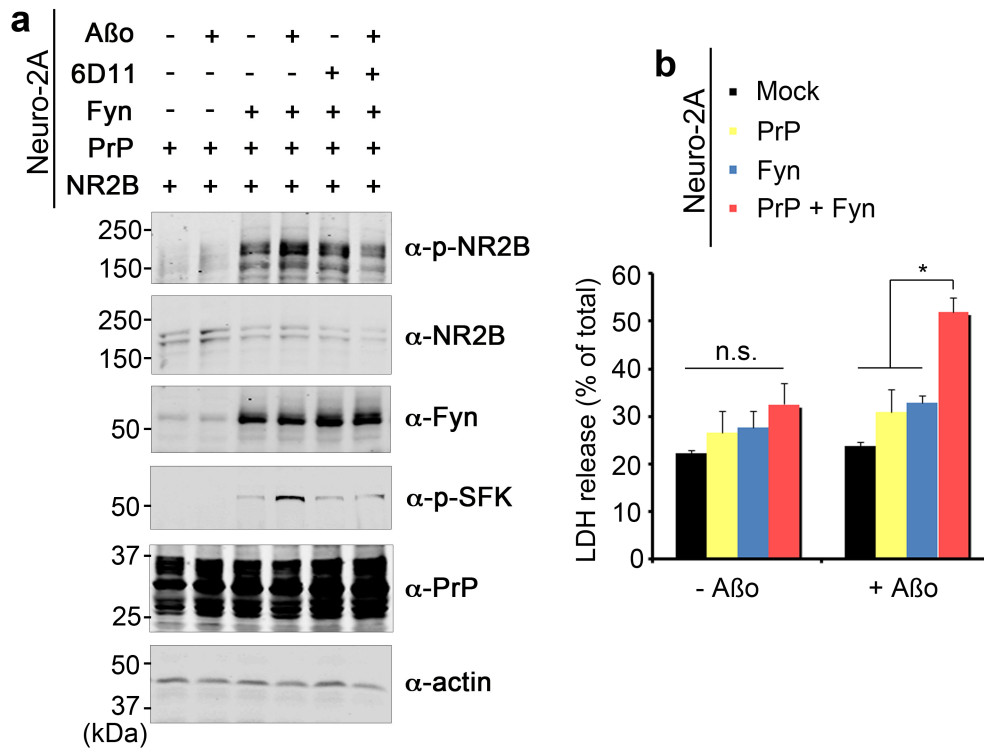

**Suppl. Fig. S6. A $\beta$ o Phosphorylates NR2B and Produces Cell Toxicity in N2A Neuroblastoma Cells via PrP and Fyn.**

**a** N2A cells were transfected with expression vectors for PrP<sup>C</sup> plus NR2B with or without Fyn, and some cultures were then pre-incubated for 1 h with 10  $\mu$ g/ml of 6D11 antibody prior to A $\beta$  exposure. After treatment of cells with 0 or 1  $\mu$ M of A $\beta$ o (monomer equivalent, 10 nM estimated oligomer) for 20 min, lysates were subjected to immunoblot with anti-phospho-NR2B (Tyr 1472), anti-NR2B, anti-Fyn, anti-phospho-SFK (Tyr 416) or anti-PrP antibody. Actin served as a loading control.

**b** N2A cells were transfected with expression vectors for PrP<sup>C</sup>, or Fyn, or both, and then treated 48 hours later with 0 or 1  $\mu$ M A $\beta$ o for 1.5 h. Cell toxicity was determined by LDH release. Data are mean  $\pm$  s.e.m. \*,  $P < 0.05$ ; one-way ANOVA, with Tukey post-hoc pairwise comparisons.

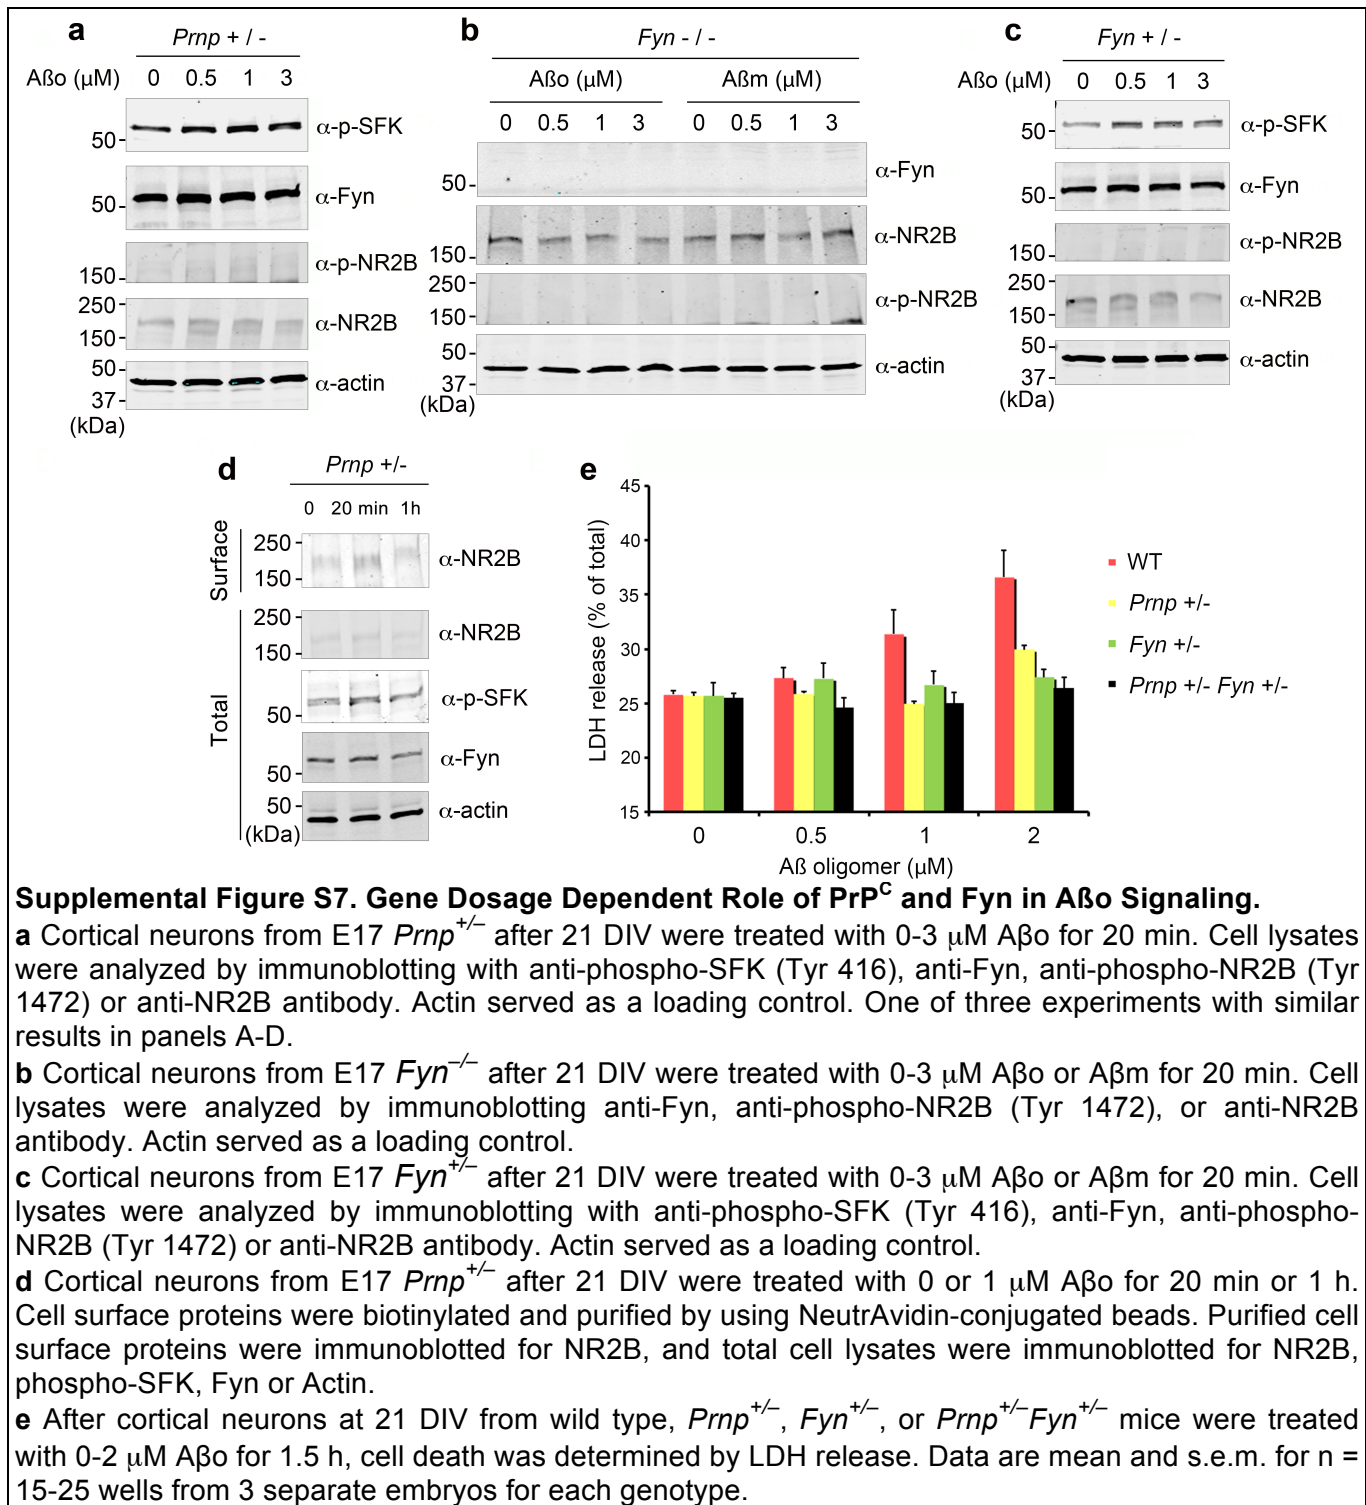



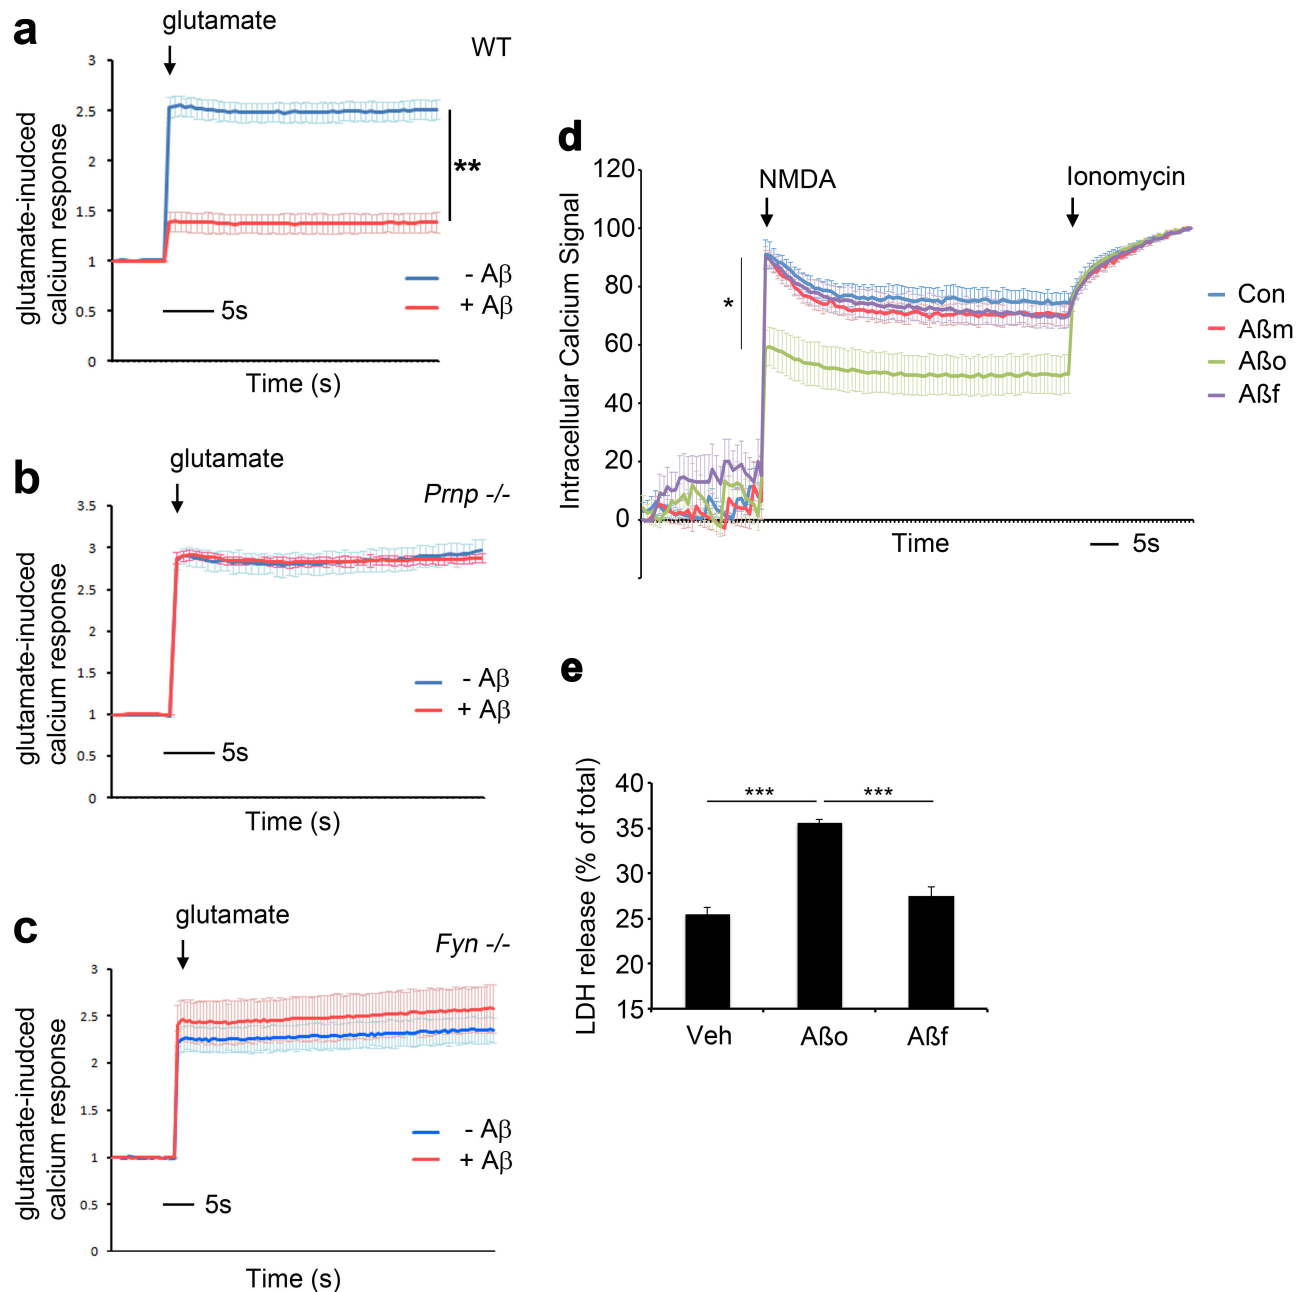

**Supplemental Figure S8. Specificity of Aβ effects on neuronal calcium signals and toxicity.**

**a-c** Cortical neurons from wild type (**a**), *Prnp*<sup>-/-</sup> (**b**) or *Fyn*<sup>-/-</sup> (**c**) were treated with 0 or 1 μM Aβ<sub>o</sub> for 60 min. The change of intracellular calcium concentration in response to glutamate (100 μM) was monitored by using FLIPR Calcium 4 assay kit. Mean ± s.e.m. For each genotype, n = 15 separate wells derived from 3 mouse embryos. \*\*, *P* < 0.01 by Repeated Measures ANOVA for 1-20 seconds after glutamate addition. Data are normalized to pre-glutamate fluorescence; the pre-glutamate values without normalization for WT Aβ<sub>o</sub> 60 min, *Prnp*<sup>-/-</sup> Aβ<sub>o</sub> 60 min and *Fyn*<sup>-/-</sup> Aβ<sub>o</sub> 60 min are 1.33±0.17, 1.05±0.04, and 1.11±0.08, respectively.

**d** Cortical neurons from wild type were treated with 1 μM Aβ oligomer (Aβ<sub>o</sub>), Aβ monomer (Aβ<sub>m</sub>) or Aβ fibril (Aβ<sub>f</sub>) for 60 min. The change of intracellular calcium concentration in response to NMDA (50 μM) or ionomycin (500 nM) was monitored by using FLIPR Calcium 4 assay kit. Mean ± s.e.m. n = 24 separate wells derived from 3 mouse embryos. \*\*, *P* < 0.01 by Repeated Measures ANOVA for 1-20 seconds after NMDA addition.

**e** Cortical neurons at 21 DIV from wild type were treated with 1  $\mu$ M A $\beta$ <sub>o</sub> or A $\beta$ <sub>f</sub> for 2 h, prior to measurement of LDH release. Data are mean  $\pm$  s.e.m. \*\*\*,  $P < 0.001$ ; one-way ANOVA, with Tukey post-hoc pairwise comparisons.

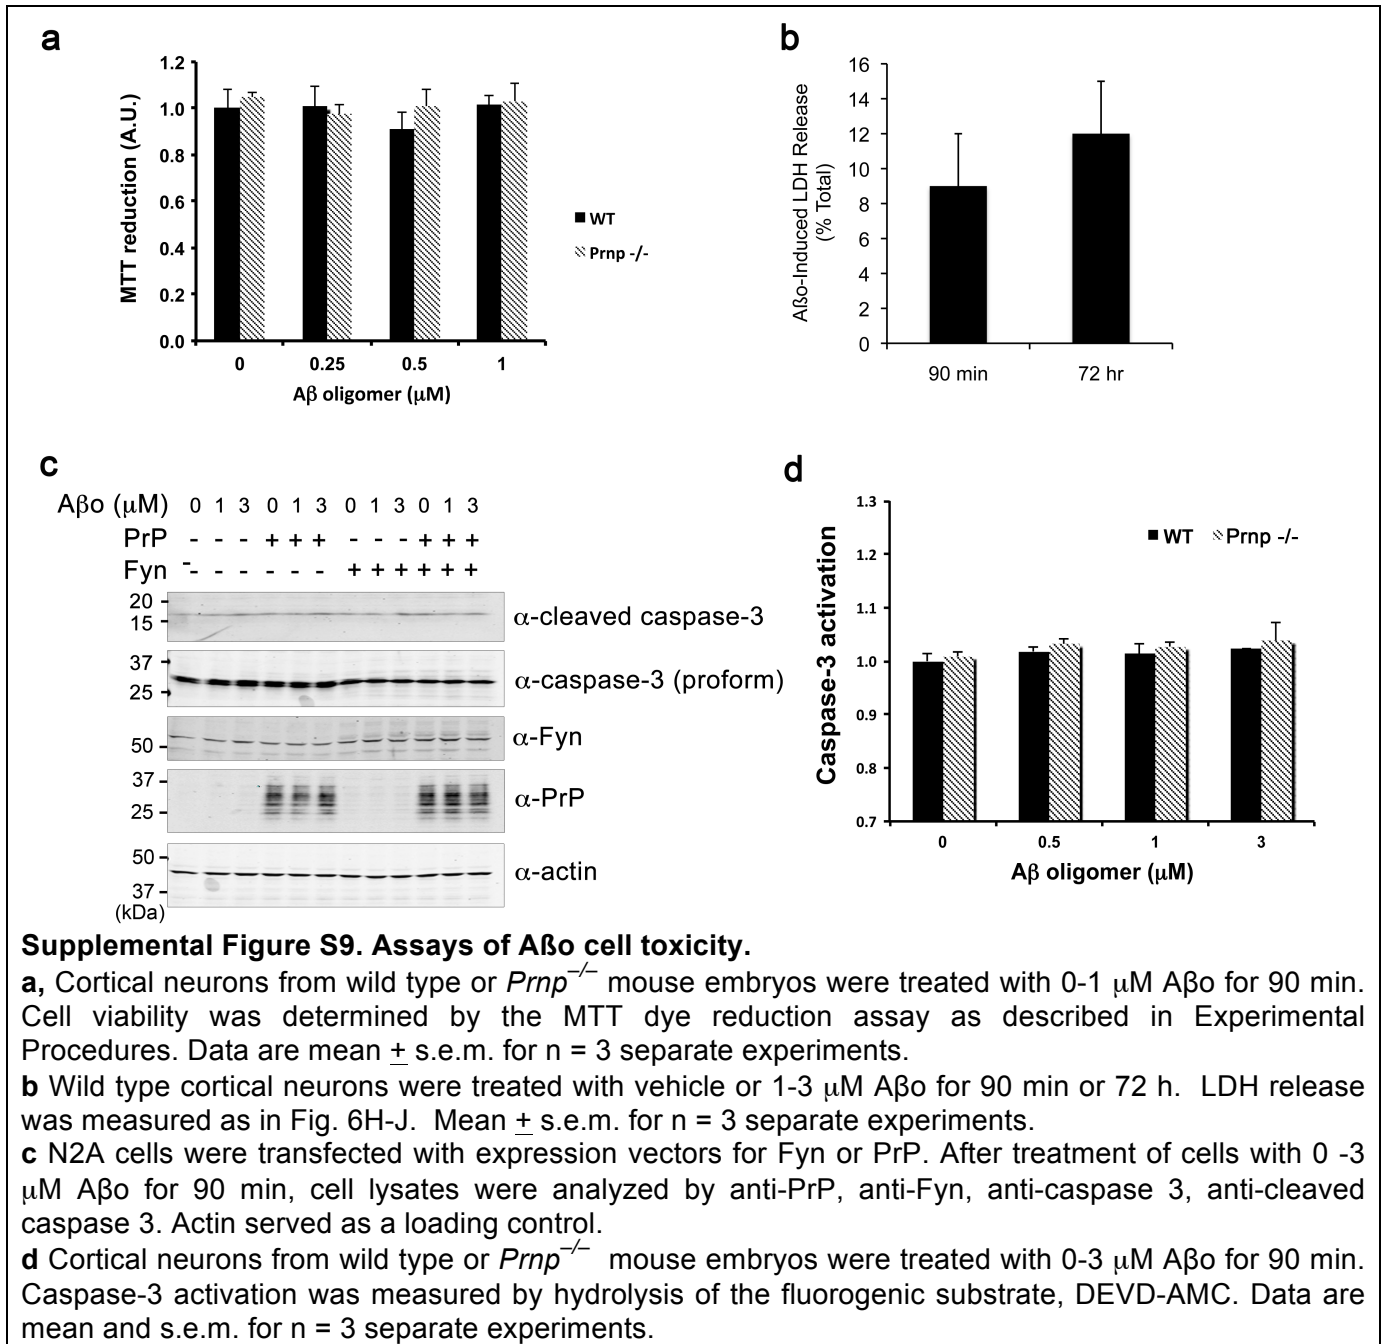

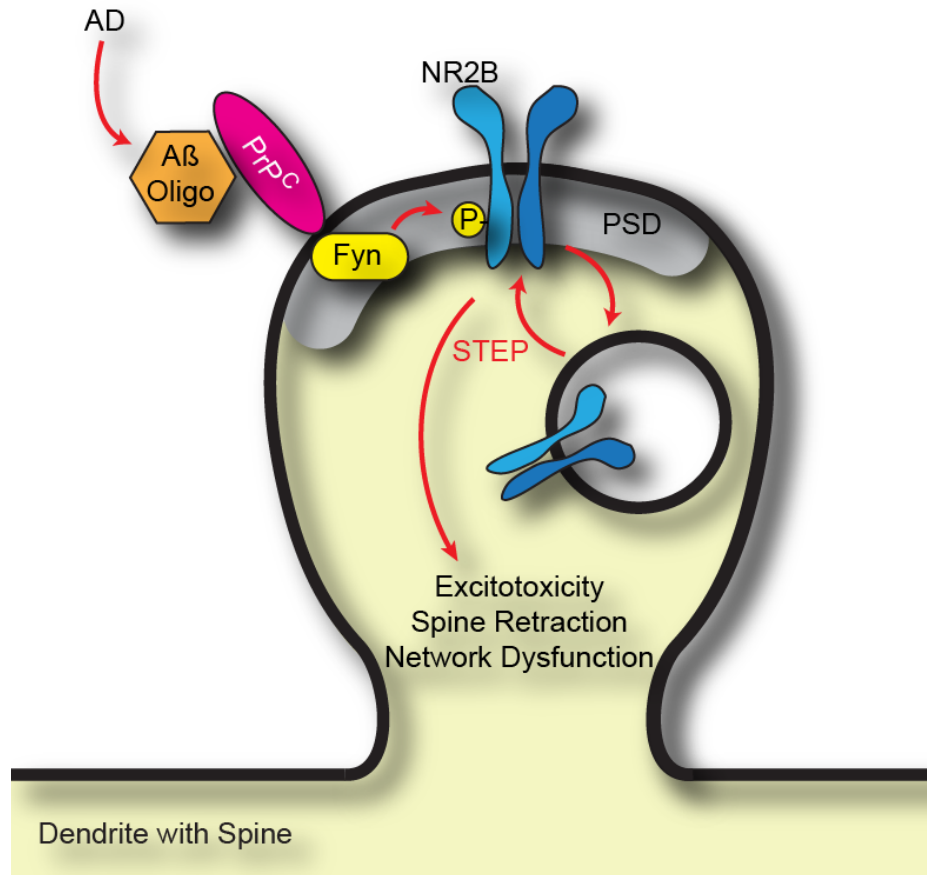

**Supplemental Figure S10. Aβ Oligomer Actions via PrP<sup>C</sup> at the Synapse.**

A model illustrates the dendritic spine and the post-synaptic density. Aβ oligomers bind to PrP<sup>C</sup> and cause Fyn activation and NMDA-R redistribution. The biphasic activation effect initially increases surface NMDA-R and calcium influx, but is followed by loss of spines and surface NMDA-R and calcium signals.
